# Supplementary material for: Blood Genome-Wide Transcriptional Profiles of HER2 Negative Breast Cancers Patients
Source: Mediators Inflamm. 2016 Jan 13;2016:3239167. doi: 10.1155/2016/3239167 (PMC4738716; doi:10.1155/2016/3239167)
Supplement: Supplementary file 1 — The Additional file 1 contains the full lists of specific genes/sequences with their fold change and description for ER−PR−HER2− and ER+PR+HER2− subtypes, as well as the statistically significant biofunctions for innate and adaptive immune cells, focused on the implications of immune cells in tumor development. [file 3239167.f1.xlsx]

## Sheet: TNBCsignature
ProbeName	Fold change (TNBCvsCTR_FC1.5 )	Regulation (TNBCvsCTR_FC1.5 )	Fold change (TNBCvsER+PR+HER2-_FC1.5 )	Regulation (TNBCvsER+PR+HER2-_FC1.5 )	GeneSymbol	GenbankAccession	Description
A_33_P3355407	-1.6458	down	-1.52643	down	RNU105A	NR_004404	Homo sapiens RNA, U105A small nucleolar (RNU105A), small nucleolar RNA [NR_004404]
A_23_P24104	1.56512	up	1.54832	up	PLAU	NM_002658	Homo sapiens plasminogen activator, urokinase (PLAU), transcript variant 1, mRNA [NM_002658]
A_33_P3363082	-1.78706	down	-1.75044	down	SCARNA5	NR_003008	Homo sapiens small Cajal body-specific RNA 5 (SCARNA5), guide RNA [NR_003008]
A_33_P3370575	-2.15269	down	-2.02897	down	CD200	NM_001004196	Homo sapiens CD200 molecule (CD200), transcript variant 2, mRNA [NM_001004196]
A_33_P3420496	-1.88537	down	-3.07029	down	SNORA53	NR_003015	Homo sapiens small nucleolar RNA, H/ACA box 53 (SNORA53), small nucleolar RNA [NR_003015]
A_23_P419411	2.06574	up	1.94485	up	LOC100128175	AF119886	Homo sapiens PRO2591 mRNA, complete cds. [AF119886]
A_33_P3273819	-1.53075	down	-1.70717	down		AK090675	Homo sapiens cDNA FLJ33356 fis, clone BRACE2005160. [AK090675]
A_33_P3293913	-1.82715	down	-1.97234	down	BICC1	NM_001080512	Homo sapiens bicaudal C homolog 1 (Drosophila) (BICC1), mRNA [NM_001080512]
A_33_P3302881	-2.23258	down	-1.61492	down	KLHL31	NM_001003760	Homo sapiens kelch-like 31 (Drosophila) (KLHL31), mRNA [NM_001003760]
A_33_P3288684	-1.69606	down	-2.06549	down
A_33_P3227217	-2.07378	down	-2.64216	down	SNORA81	NR_002989	Homo sapiens small nucleolar RNA, H/ACA box 81 (SNORA81), small nucleolar RNA [NR_002989]
A_32_P190151	-1.57204	down	-1.64084	down	FAM86DP	NR_024241	Homo sapiens family with sequence similarity 86, member D, pseudogene (FAM86DP), non-coding RNA [NR_024241]
A_33_P3226542	-2.0104	down	-2.05784	down	SNORD3B-1	NR_003271	Homo sapiens small nucleolar RNA, C/D box 3B-1 (SNORD3B-1), small nucleolar RNA [NR_003271]
A_33_P3279708	-1.81207	down	-2.03235	down	RNU2-2	NR_002761	Homo sapiens RNA, U2 small nuclear 2 (RNU2-2), small nuclear RNA [NR_002761]
A_33_P3397955	2.25269	up	2.13573	up	ITPK1-AS1	NR_002808	Homo sapiens ITPK1 antisense RNA 1 (non-protein coding) (ITPK1-AS1), non-coding RNA [NR_002808]
A_33_P3216557	1.91114	up	2.05588	up			Uncharacterized protein [Source:UniProtKB/TrEMBL;Acc:C9JHT1] [ENST00000449623]
A_33_P3210099	1.57498	up	1.6174	up	ALPK3	NM_020778	Homo sapiens alpha-kinase 3 (ALPK3), mRNA [NM_020778]
A_33_P3322999	2.11959	up	1.56445	up	C10orf105	NM_001164375	Homo sapiens chromosome 10 open reading frame 105 (C10orf105), transcript variant 1, mRNA [NM_001164375]
A_24_P159702	-1.79479	down	-1.55154	down	LMAN1	NM_005570	Homo sapiens lectin, mannose-binding, 1 (LMAN1), mRNA [NM_005570]
A_32_P90483	-2.0243	down	-1.89206	down	STXBP4	NM_178509	Homo sapiens syntaxin binding protein 4 (STXBP4), mRNA [NM_178509]
A_33_P3283213	-1.83875	down	-1.60548	down	MGC57346	NR_027295	Homo sapiens uncharacterized LOC401884 (MGC57346), transcript variant 2, non-coding RNA [NR_027295]
A_24_P367645	-1.8635	down	-1.65706	down	MAP7D2	NM_152780	Homo sapiens MAP7 domain containing 2 (MAP7D2), transcript variant 2, mRNA [NM_152780]
A_32_P404549	-1.90831	down	-1.62163	down	CCDC39	NM_181426	Homo sapiens coiled-coil domain containing 39 (CCDC39), mRNA [NM_181426]
A_33_P3578325	-2.02317	down	-2.06299	down	SNORD15A	NR_000005	Homo sapiens small nucleolar RNA, C/D box 15A (SNORD15A), small nucleolar RNA [NR_000005]
A_33_P3252333	-1.78785	down	-1.80942	down	SNORD3B-1	NR_003271	Homo sapiens small nucleolar RNA, C/D box 3B-1 (SNORD3B-1), small nucleolar RNA [NR_003271]
A_33_P3269779	-1.50973	down	-1.82267	down	ZNF3	NM_017715	Homo sapiens zinc finger protein 3 (ZNF3), transcript variant 1, mRNA [NM_017715]
A_33_P3263379	-1.70667	down	-1.70443	down	SNORD17	NR_003045	Homo sapiens small nucleolar RNA, C/D box 17 (SNORD17), small nucleolar RNA [NR_003045]
A_33_P3671291	-1.76349	down	-1.5408	down	SNORA12	AA378382	EST91069 Synovial sarcoma Homo sapiens cDNA 5' end, mRNA sequence [AA378382]
A_23_P146325	1.51777	up	1.61154	up	ASAP1-IT1	NR_002765	Homo sapiens ASAP1 intronic transcript 1 (non-protein coding) (ASAP1-IT1), non-coding RNA [NR_002765]
A_24_P354715	-2.00894	down	-1.79895	down	NT5E	NM_002526	Homo sapiens 5'-nucleotidase, ecto (CD73) (NT5E), transcript variant 1, mRNA [NM_002526]
A_33_P3265419	1.6481	up	1.56759	up
A_33_P3327519	-2.62658	down	-3.23512	down	SNORA74A	NR_002915	Homo sapiens small nucleolar RNA, H/ACA box 74A (SNORA74A), small nucleolar RNA [NR_002915]
A_24_P316430	-2.1219	down	-1.54645	down	NT5E	NM_002526	Homo sapiens 5'-nucleotidase, ecto (CD73) (NT5E), transcript variant 1, mRNA [NM_002526]
A_33_P3230837	-1.75	down	-1.58295	down	SCARNA6	NR_003006	Homo sapiens small Cajal body-specific RNA 6 (SCARNA6), guide RNA [NR_003006]

## Sheet: ER+PR+HER2-signature
ProbeName	Fold change (ER+PR+HER2-vsCTR_FC1.5 )	Regulation (ER+PR+HER2-vsCTR_FC1.5 )	Fold change([t] vs [d]) (TNBCvsER+PR+HER2-_FC1.5 )	Regulation (TNBCvsER+PR+HER2-_FC1.5 )	GeneSymbol	GenbankAccession	Description
A_23_P115366	1.90083	up	-1.67949	down	CMPK1	NM_016308	Homo sapiens cytidine monophosphate (UMP-CMP) kinase 1, cytosolic (CMPK1), transcript variant 1, mRNA [NM_016308]
A_33_P3236340	-1.69653	down	1.55704	up	LOC100133131	AF289593	Homo sapiens clone pp7683 unknown mRNA. [AF289593]
A_23_P121596	1.82701	up	-1.71466	down	PPBP	NM_002704	Homo sapiens pro-platelet basic protein (chemokine (C-X-C motif) ligand 7) (PPBP), mRNA [NM_002704]
A_23_P117298	-2.30255	down	2.12396	up	F7	NM_000131	Homo sapiens coagulation factor VII (serum prothrombin conversion accelerator) (F7), transcript variant 1, mRNA [NM_000131]
A_33_P3223825	-1.59741	down	1.57948	up	SRRM3	NM_001110199	Homo sapiens serine/arginine repetitive matrix 3 (SRRM3), mRNA [NM_001110199]
A_23_P113701	1.60636	up	-1.55222	down	PDGFA	NM_002607	Homo sapiens platelet-derived growth factor alpha polypeptide (PDGFA), transcript variant 1, mRNA [NM_002607]
A_33_P3311956	1.69589	up	-1.50214	down	FEZ2	NM_001042548	Homo sapiens fasciculation and elongation protein zeta 2 (zygin II) (FEZ2), transcript variant 2, mRNA [NM_001042548]
A_33_P3306749	-1.74797	down	1.75687	up	OLFM1	BC000189	Homo sapiens olfactomedin 1, mRNA (cDNA clone IMAGE:3351052), complete cds. [BC000189]
A_33_P3413483	1.73425	up	-1.51534	down	SORD	AK090738	Homo sapiens cDNA FLJ33419 fis, clone BRACE2019877. [AK090738]
A_33_P3385453	1.761	up	-1.63425	down	BRCC3		BRCA1/BRCA2-containing complex, subunit 3 [Source:HGNC Symbol;Acc:24185] [ENST00000399026]
A_24_P265832	2.5403	up	-2.43675	down	SUCNR1	NM_033050	Homo sapiens succinate receptor 1 (SUCNR1), mRNA [NM_033050]
A_23_P206018	1.92777	up	-1.68805	down	TPM1	NM_001018004	Homo sapiens tropomyosin 1 (alpha) (TPM1), transcript variant 3, mRNA [NM_001018004]
A_32_P119248	-1.57083	down	1.53965	up	FOXD4	NM_207305	Homo sapiens forkhead box D4 (FOXD4), mRNA [NM_207305]
A_33_P3421490	1.69721	up	-1.50918	down	KIAA1024	NM_015206	Homo sapiens KIAA1024 (KIAA1024), mRNA [NM_015206]
A_32_P198990	-1.6134	down	1.63969	up	LOC100131929	AK126439	Homo sapiens cDNA FLJ44475 fis, clone UTERU2031521. [AK126439]
A_33_P3356637	-1.87845	down	1.54574	up
A_33_P3380529	1.91896	up	-1.91666	down	PRTFDC1	NM_020200	Homo sapiens phosphoribosyl transferase domain containing 1 (PRTFDC1), mRNA [NM_020200]
A_33_P3282634	-2.52528	down	1.67081	up	ALDH1L2	NM_001034173	Homo sapiens aldehyde dehydrogenase 1 family, member L2 (ALDH1L2), nuclear gene encoding mitochondrial protein, transcript variant 1, mRNA [NM_001034173]
A_33_P3307402	-2.68811	down	2.53112	up
A_33_P3375636	-1.77274	down	1.85751	up	FAM196B	NM_001129891	Homo sapiens family with sequence similarity 196, member B (FAM196B), mRNA [NM_001129891]
A_32_P424761	1.8165	up	-1.5908	down	C12orf28	XM_001716650	chromosome 12 open reading frame 28 [Source:HGNC Symbol;Acc:26316] [ENST00000299350]
A_33_P3212555	3.12465	up	-2.66536	down	PROS1	NM_000313	Homo sapiens protein S (alpha) (PROS1), mRNA [NM_000313]
A_32_P104063	2.7579	up	-1.94325	down	CRNDE	NR_034105	Homo sapiens colorectal neoplasia differentially expressed (non-protein coding) (CRNDE), transcript variant 1, non-coding RNA [NR_034105]
A_33_P3217119	2.06121	up	-2.0044	down	OSCP1	NM_206837	Homo sapiens organic solute carrier partner 1 (OSCP1), transcript variant 2, mRNA [NM_206837]
A_33_P3419113	-2.19669	down	2.03619	up	PRY2	NM_001002758	Homo sapiens PTPN13-like, Y-linked 2 (PRY2), mRNA [NM_001002758]
A_33_P3377786	-1.62793	down	1.72286	up	LOC100509553	XR_133064	PREDICTED: Homo sapiens ETS domain-containing protein Elk-1-like (LOC100509553), miscRNA [XR_133064]
A_24_P195272	-1.78719	down	1.84107	up
A_33_P3276062	-1.63175	down	1.54308	up
A_23_P28834	2.09385	up	-2.33049	down	PHACTR3	NM_080672	Homo sapiens phosphatase and actin regulator 3 (PHACTR3), transcript variant 1, mRNA [NM_080672]
A_33_P3388070	-1.8166	down	1.73191	up		DB226000	DB226000 TRACH3 Homo sapiens cDNA clone TRACH3018100 5', mRNA sequence [DB226000]
A_33_P3401459	-1.92207	down	1.62542	up	SPTBN4	NM_020971	Homo sapiens spectrin, beta, non-erythrocytic 4 (SPTBN4), transcript variant sigma1, mRNA [NM_020971]
A_33_P3260342	-2.86745	down	2.87227	up	NFASC	NM_001005388	Homo sapiens neurofascin (NFASC), transcript variant 1, mRNA [NM_001005388]
A_24_P783008	-1.8384	down	1.89241	up	LOC200726	NM_001102659	Homo sapiens hCG1657980 (LOC200726), mRNA [NM_001102659]
A_24_P371281	2.13676	up	-2.24718	down	TMEM22	NM_025246	Homo sapiens transmembrane protein 22 (TMEM22), transcript variant 1, mRNA [NM_025246]
A_33_P3337959	-1.80176	down	1.62889	up	LOC100130236	AK128227	Homo sapiens cDNA FLJ46360 fis, clone TESTI4049863. [AK128227]
A_33_P3452003	-1.68705	down	1.50198	up	LOC143286	AL049428	Homo sapiens mRNA; cDNA DKFZp586E171 (from clone DKFZp586E171) [AL049428]
A_33_P3212799	-1.94182	down	1.66463	up	C22orf34	NR_026997	Homo sapiens chromosome 22 open reading frame 34 (C22orf34), non-coding RNA [NR_026997]
A_23_P217178	-2.22003	down	2.15969	up	MAGEC1	NM_005462	Homo sapiens melanoma antigen family C, 1 (MAGEC1), mRNA [NM_005462]
A_33_P3367396	-2.90565	down	2.51884	up	FAM177B	NM_207468	Homo sapiens family with sequence similarity 177, member B (FAM177B), mRNA [NM_207468]
A_33_P3298612	-2.34949	down	2.10296	up
A_33_P3219121	-2.33433	down	2.21282	up	KALRN	AK131379	kalirin, RhoGEF kinase [Source:HGNC Symbol;Acc:4814] [ENST00000393501]
A_23_P359870	-1.51033	down	1.54252	up		AJ312026	Homo sapiens mRNA for hypothetical protein (C8ORF16). [AJ312026]
A_23_P141005	1.99436	up	-1.73676	down	AMFR	NM_001144	Homo sapiens autocrine motility factor receptor (AMFR), mRNA [NM_001144]
A_23_P88602	2.22483	up	-2.02733	down	MEIS2	NM_170677	Homo sapiens Meis homeobox 2 (MEIS2), transcript variant a, mRNA [NM_170677]
A_33_P3304097	-2.0611	down	1.94447	up
A_24_P15658	1.91877	up	-1.88402	down	LYSMD3	NM_198273	Homo sapiens LysM, putative peptidoglycan-binding, domain containing 3 (LYSMD3), mRNA [NM_198273]
A_33_P3343485	-1.53769	down	1.53618	up	HIP1	AY358103	huntingtin interacting protein 1 [Source:HGNC Symbol;Acc:4913] [ENST00000479835]
A_32_P76156	1.76418	up	-1.57044	down	RWDD4	NM_152682	Homo sapiens RWD domain containing 4 (RWDD4), mRNA [NM_152682]
A_24_P362540	1.71489	up	-1.57485	down	ASAP2	NM_003887	Homo sapiens ArfGAP with SH3 domain, ankyrin repeat and PH domain 2 (ASAP2), transcript variant 1, mRNA [NM_003887]
A_24_P141214	1.56098	up	-1.62274	down	STOM	NM_198194	Homo sapiens stomatin (STOM), transcript variant 2, mRNA [NM_198194]
A_24_P209171	1.83415	up	-1.87532	down	SH3BGRL2	NM_031469	Homo sapiens SH3 domain binding glutamic acid-rich protein like 2 (SH3BGRL2), mRNA [NM_031469]
A_33_P3317412	-1.93791	down	1.73467	up	REXO1L1	NM_172239	Homo sapiens REX1, RNA exonuclease 1 homolog (S. cerevisiae)-like 1 (REXO1L1), mRNA [NM_172239]
A_33_P3303542	-1.55199	down	1.67158	up	SSC5D	NM_001144950	Homo sapiens scavenger receptor cysteine rich domain containing (5 domains) (SSC5D), transcript variant 1, mRNA [NM_001144950]
A_23_P24529	1.67321	up	-1.62634	down	C11orf57	NM_018195	Homo sapiens chromosome 11 open reading frame 57 (C11orf57), transcript variant 1, mRNA [NM_018195]
A_33_P3405728	1.6942	up	-2.24907	down	PKP2	NM_004572	Homo sapiens plakophilin 2 (PKP2), transcript variant 2b, mRNA [NM_004572]
A_33_P3396469	-2.42792	down	2.16397	up
A_23_P207003	2.08799	up	-2.12823	down	2014-09-04	NM_004574	Homo sapiens septin 4 (SEPT4), transcript variant 1, mRNA [NM_004574]
A_24_P527404	2.15142	up	-1.8242	down	BMPR1A	NM_004329	Homo sapiens bone morphogenetic protein receptor, type IA (BMPR1A), mRNA [NM_004329]
A_24_P40001	3.00793	up	-2.35687	down	SIGLEC8	NM_014442	Homo sapiens sialic acid binding Ig-like lectin 8 (SIGLEC8), mRNA [NM_014442]
A_33_P3357283	-2.14987	down	1.93357	up		XM_001715205	gamma-glutamyltransferase 3 pseudogene [Source:HGNC Symbol;Acc:4252] [ENST00000412448]
A_33_P3300837	-1.81513	down	1.55752	up	LDB2	NM_001290	Homo sapiens LIM domain binding 2 (LDB2), transcript variant 1, mRNA [NM_001290]
A_33_P3314091	-1.50255	down	1.57354	up
A_23_P410110	2.1992	up	-1.82349	down	C10orf25	NM_001039380	Homo sapiens chromosome 10 open reading frame 25 (C10orf25), mRNA [NM_001039380]
A_33_P3405897	-1.71265	down	1.54431	up	PLEKHM1	NM_014798	Homo sapiens pleckstrin homology domain containing, family M (with RUN domain) member 1 (PLEKHM1), transcript variant 1, mRNA [NM_014798]
A_33_P3334630	-2.48826	down	2.09023	up	PLP1	NM_001128834	Homo sapiens proteolipid protein 1 (PLP1), transcript variant 3, mRNA [NM_001128834]
A_33_P3544880	-1.5854	down	1.50115	up	LOC142937	BC008131	Homo sapiens cDNA clone IMAGE:3454038. [BC008131]
A_33_P3379056	-2.47592	down	2.24912	up
A_23_P151637	1.83805	up	-2.02863	down	RNASE2	NM_002934	Homo sapiens ribonuclease, RNase A family, 2 (liver, eosinophil-derived neurotoxin) (RNASE2), mRNA [NM_002934]
A_23_P367043	1.7607	up	-1.50879	down	CDC14C	NR_003595	Homo sapiens CDC14 cell division cycle 14 homolog C (S. cerevisiae) (CDC14C), non-coding RNA [NR_003595]
A_33_P3379526	-2.59701	down	2.564	up		AK127601	Homo sapiens cDNA FLJ45698 fis, clone FEBRA2017811. [AK127601]
A_33_P3255964	-2.56502	down	2.3373	up	CYMP	NR_003599	Homo sapiens chymosin pseudogene (CYMP), non-coding RNA [NR_003599]
A_33_P3809328	-2.09663	down	2.07632	up	PRO0471	AF111846	Homo sapiens PRO0471 mRNA, complete cds. [AF111846]
A_24_P229726	-1.89081	down	1.51585	up
A_23_P408787	2.44201	up	-1.84896	down	C1orf150	NM_145278	Homo sapiens chromosome 1 open reading frame 150 (C1orf150), mRNA [NM_145278]
A_33_P3364493	-1.74944	down	1.63562	up
A_33_P3394727	1.94599	up	-1.82379	down	KHDRBS3	NM_006558	Homo sapiens KH domain containing, RNA binding, signal transduction associated 3 (KHDRBS3), mRNA [NM_006558]
A_24_P81965	2.50786	up	-1.89831	down	RAP2A	NM_021033	Homo sapiens RAP2A, member of RAS oncogene family (RAP2A), mRNA [NM_021033]
A_33_P3269824	1.92751	up	-1.77814	down	LRRC66	NM_001024611	Homo sapiens leucine rich repeat containing 66 (LRRC66), mRNA [NM_001024611]
A_33_P3250939	2.64737	up	-2.21842	down	RAB3C	NM_138453	Homo sapiens RAB3C, member RAS oncogene family (RAB3C), mRNA [NM_138453]
A_23_P256205	1.66979	up	-1.66408	down	ABLIM3	NM_014945	Homo sapiens actin binding LIM protein family, member 3 (ABLIM3), mRNA [NM_014945]
A_33_P3265249	-1.76937	down	1.62655	up
A_33_P3353873	-1.99975	down	1.9805	up
A_24_P56484	2.06928	up	-2.23354	down	BRMS1L	NM_032352	Homo sapiens breast cancer metastasis-suppressor 1-like (BRMS1L), mRNA [NM_032352]
A_33_P3365720	-2.38877	down	2.22159	up	FLJ35424	NR_040045	Homo sapiens uncharacterized FLJ35424 (FLJ35424), non-coding RNA [NR_040045]
A_24_P11061	-1.58338	down	1.53512	up	CSAG1	NM_153478	Homo sapiens chondrosarcoma associated gene 1 (CSAG1), transcript variant a, mRNA [NM_153478]
A_23_P42931	1.72897	up	-1.97631	down	CLEC2L	NM_001080511	Homo sapiens C-type lectin domain family 2, member L (CLEC2L), mRNA [NM_001080511]
A_33_P3270668	2.07681	up	-1.82652	down	FAM131B	NM_001031690	Homo sapiens family with sequence similarity 131, member B (FAM131B), transcript variant a, mRNA [NM_001031690]
A_33_P3292287	-2.24979	down	2.03595	up	KIAA0087	NR_022006	Homo sapiens KIAA0087 (KIAA0087), non-coding RNA [NR_022006]
A_33_P3872301	-2.34752	down	1.9825	up	SNAR-C3	BF570763	602075775F1 NIH_MGC_62 Homo sapiens cDNA clone IMAGE:4242834 5', mRNA sequence [BF570763]
A_23_P77145	2.0097	up	-1.6695	down	RAB11A	NM_004663	Homo sapiens RAB11A, member RAS oncogene family (RAB11A), transcript variant 1, mRNA [NM_004663]
A_24_P189533	1.51111	up	-1.50697	down	ENDOD1	NM_015036	Homo sapiens endonuclease domain containing 1 (ENDOD1), mRNA [NM_015036]
A_33_P3423202	-2.0074	down	1.77387	up
A_33_P3242508	1.85814	up	-1.67124	down	ZNF365	NM_199450	Homo sapiens zinc finger protein 365 (ZNF365), transcript variant B, mRNA [NM_199450]
A_33_P3328254	2.69695	up	-2.37453	down	IL5RA	NM_175725	Homo sapiens interleukin 5 receptor, alpha (IL5RA), transcript variant 3, mRNA [NM_175725]
A_24_P261760	1.86249	up	-1.69617	down	KLRG1	NM_005810	Homo sapiens killer cell lectin-like receptor subfamily G, member 1 (KLRG1), mRNA [NM_005810]
A_24_P802145	1.63542	up	-1.51676	down	IRS1	NM_005544	Homo sapiens insulin receptor substrate 1 (IRS1), mRNA [NM_005544]
A_33_P3277228	-1.70681	down	1.71977	up	OVOS	XM_003403834	PREDICTED: Homo sapiens ovostatin (OVOS), mRNA [XM_003403834]
A_32_P170621	-2.71881	down	2.30834	up	CASC2	NR_026941	Homo sapiens cancer susceptibility candidate 2 (non-protein coding) (CASC2), transcript variant 3, non-coding RNA [NR_026941]
A_24_P221414	1.84824	up	-1.61451	down	DYNC1I1	NM_004411	Homo sapiens dynein, cytoplasmic 1, intermediate chain 1 (DYNC1I1), transcript variant 1, mRNA [NM_004411]
A_33_P3596355	-3.09718	down	2.56622	up	LOC644242	BG033631	602301760F1 NIH_MGC_87 Homo sapiens cDNA clone IMAGE:4403366 5', mRNA sequence [BG033631]
A_33_P3379535	-1.81638	down	1.79318	up		AK127601	Homo sapiens cDNA FLJ45698 fis, clone FEBRA2017811. [AK127601]
A_24_P167496	1.71552	up	-1.5232	down	PUS7L	NM_031292	Homo sapiens pseudouridylate synthase 7 homolog (S. cerevisiae)-like (PUS7L), transcript variant 3, mRNA [NM_031292]
A_33_P3220853	-1.89078	down	1.90586	up
A_23_P134085	2.18689	up	-2.00201	down	CNKSR3	NM_173515	Homo sapiens CNKSR family member 3 (CNKSR3), mRNA [NM_173515]
A_32_P832001	1.61158	up	-1.89915	down		AF161364	Homo sapiens HSPC101 mRNA, partial cds. [AF161364]
A_33_P3352268	-2.22046	down	2.14591	up
A_33_P3710442	-1.50469	down	1.69151	up	FLJ11710	AK021772	Homo sapiens cDNA FLJ11710 fis, clone HEMBA1005149. [AK021772]
A_33_P3399693	-1.84413	down	1.77975	up		AK127048	Uncharacterized protein [Source:UniProtKB/TrEMBL;Acc:E9PF64] [ENST00000480694]

## Sheet: immune functions
Biofunction for innate immune cells
Cell type	Biofunction	p-value
		BC vs. Control	ER+PR+HER2- vs. Control	TNBC vs. Control	TNBC vs. ER+PR+HER2-
Dendritic cells (DCs)*	recruitment of dendritic cells	0.000117569	0.00126081	0.000210202	N/A
	chemotaxis of dendritic cells	0.00101271	0.00308682	2.9936e-05	N/A
	cell movement of monocyte-derived dendritic cells	0.00366807	0.00260313	0.000447316	N/A
	cell movement of dendritic cells	0.00196915	N/A	0.000220499	N/A
	trafficking of plasmacytoid dendritic cells	N/A	N/A	0.000156602	N/A
	transmigration of dendritic cells	N/A	N/A	0.000966216	N/A
	chemotaxis of bone marrow-derived dendritic cells	N/A	N/A	0.00315486	N/A
	differentiation of plasmacytoid precursor dendritic cells	N/A	N/A	N/A	0.017053
	formation of dendritic cells	N/A	N/A	N/A	0.029654
Neutrophils	recruitment of neutrophils	0.00342881	N/A	N/A	N/A
	mobilization of neutrophils	2.56055e-07	5.62183e-06	5.4213e-07	N/A
	apoptosis of neutrophils	2.25606e-06	0.00012778	6.12184e-06	N/A
	attraction of neutrophils	6.79176e-05	5.08568e-05	0.000121942	N/A
	chemokinesis of neutrophils	4.18381e-05	0.000268874	6.56506e-05	N/A
	degranulation of neutrophils	0.000117569	0.000101064	0.000210202	N/A
	activation of neutrophils	4.96756e-05	0.000434987	0.000128177	N/A
	chemotaxis of neutrophils	0.000101446	0.000189762	0.000314709	N/A
	oxidation of neutrophils	0.000115645	0.000406428	0.000156602	N/A
	influx of neutrophils	0.000162658	0.00274018	2.87884e-05	N/A
	infiltration by neutrophils	0.000281849	0.000316578	0.000151014	N/A
	chemoattraction of neutrophils	0.000411513	0.000139315	0.000639785	N/A
	cell movement of neutrophils	0.000729772	0.000291631	0.000211146	N/A
	migration of neutrophils	0.000830683	N/A	0.00029944	N/A
	binding of neutrophils	0.000971206	N/A	0.00169584	N/A
	response of neutrophils	N/A	N/A	0.00057661	N/A
	adhesion of neutrophils	N/A	N/A	0.00185351	N/A
	desensitization of neutrophils	N/A	0.000406428	N/A	0.00856269
Eosinophils	cell movement of eosinophils	0.00135078	0.00196392	0.00052863	N/A
	migration of eosinophils	N/A	N/A	0.00103583	N/A
Macrophage	migration of macrophages	0.00027564	0.0014378	9.51137e-06	N/A
	cell movement of peritoneal macrophages	9.88044e-05	0.00106752	0.0001769	N/A
	migration of peritoneal macrophages	0.000411513	0.00251708	0.000639785	N/A
	extravasation of macrophages	0.000684036	0.00237377	0.000924108	N/A
	cell movement of macrophages	0.00319916	0.00429846	0.000776989	N/A
	apoptosis of peritoneal macrophages	N/A	0.00449598	N/A	N/A
	recruitment of macrophages	0.00349984	N/A	N/A	N/A
	chemoattraction of macrophages	0.00396076	N/A	N/A
	accumulation of macrophages	N/A	N/A	N/A	0.00338304
	quantity of alveolar macrophages	N/A	N/A	N/A	0.0338188
Phagocytes (Granulocytes Macrophage, DC, mast cells)	recruitment of phagocytes	0.00160396	N/A	N/A	N/A
	cell rolling of phagocytes	0.002983	0.00198547	N/A	N/A
	mobilization of phagocytes	1.26035e-07	4.90441e-06	3.07676e-07	N/A
	chemoattraction of phagocytes	2.16416e-06	4.71898e-07	2.72628e-07	N/A
	apoptosis of phagocytes	1.08747e-05	0.000211084	0.000214188	N/A
	degranulation of phagocytes	3.86927e-05	0.000252531	0.000646721	N/A
	activation of phagocytes	0.000431266	0.00028923	0.00049762	N/A
	chemotaxis of phagocytes	0.00310479	0.000135354	0.000276219	N/A
	cell movement of phagocytes	N/A	0.00025921	0.000461733	N/A
	binding of phagocytes	0.00154706	N/A	0.00061943	N/A
	response of phagocytes	0.00271544	N/A	0.000475704	N/A
	accumulation of phagocytes	N/A	N/A	0.000372718	N/A
	trafficking of phagocytes	N/A	N/A	0.000393923	N/A
	adhesion of phagocytes	N/A	N/A	0.000410238	N/A
	migration of phagocytes	N/A	N/A	0.000436564	N/A
	transmigration of phagocytes	N/A	N/A	0.00223168	N/A
Antigen presenting cells -APCs**	cell movement of antigen presenting cells	0.00296552	0.00206015	0.000348023	N/A
	migration of antigen presenting cells	0.00322379	N/A	8.57949e-05	N/A
	chemoattraction of antigen presenting cells	0.00122884	N/A	0.00189552	N/A
	recruitment of antigen presenting cells	0.00123091	N/A	0.00264034	N/A
	chemotaxis of antigen presenting cells	N/A	N/A	0.000735889	N/A
	morphology of antigen presenting cells	N/A	N/A	N/A	0.0139286
	function of antigen presenting cells	N/A	0.00392401	N/A	0.0302116
*both stimulate and inhibit cancer growth
**balance innate and adaptive imune cells
Biofunction for adaptive immune cells
Cell type	Biofunction	p-value
		BC vs. Control	ER+PR+HER2- vs. Control	TNBC vs. Control	TNBC vs. ER+PR+HER2-
Lymphocytes	chemotaxis of lymphocytes	N/A	0.00447845	N/A	N/A
	differentiation of lymphocytes	3.96352e-06	0.000107276	1.14054e-05	N/A
	proliferation of lymphocytes	2.35237e-05	8.6998e-05	0.000101296	N/A
	development of lymphocytes	7.80841e-05	5.66989e-05	7.05387e-05	N/A
	trafficking of lymphocytes	0.00444168	N/A	0.000581083	N/A
	chemoattraction of lymphocytes	0.00142232	N/A	0.00219111	N/A
	adhesion of lymphocytes	N/A	N/A	0.000686546	N/A
	cell movement of lymphocytes	N/A	N/A	0.00152829	N/A		`
	emigration of lymphocytes	N/A	N/A	0.00227223	N/A
	binding of peripheral blood lymphocytes	N/A	N/A	N/A	0.0128168
T Lymphocytes	hyperplasia of T lymphocytes	N/A	N/A	N/A	0.00328408
	differentiation of natural killer T lymphocytes	N/A	N/A	N/A	0.029654
	conversion of naive T lymphocytes	N/A	N/A	N/A	0.0212712
	accumulation of TREG cells	N/A	N/A	N/A	0.0338188
	clonal expansion of Th2 cells	N/A	N/A	N/A	0.00429043
	hyperplasia of Th2 cells	N/A	N/A	N/A	0.00856269
	migration of effector lymphocytes	0.00396076	N/A	N/A	N/A
	attraction of effector lymphocytes	0.00168589	N/A	0.00227223	N/A
	migration of naive T lymphocytes	0.00168589	N/A	3.78655e-05	N/A
	differentiation of T lymphocytes	0.000158418	0.000288253	0.000734154	N/A
	proliferation of T lymphocytes	0.000271443	0.000654179	0.000268338	N/A
	cell death of T lymphocytes	0.000610483	0.00123463	0.000716986	N/A
	apoptosis of T lymphocytes	0.000693137	0.00213399	0.000709488	N/A
	chemotaxis of T lymphocytes	0.00334236	0.00276502	0.00111999	N/A
	activation of T lymphocytes	N/A	0.0019866	0.00227037	N/A
	expansion of T lymphocytes	N/A	0.00346118	0.00287917	N/A
	transmigration of Th1 cells	0.00113196	0.0039035	0.00152744	N/A
	cell movement of cytotoxic T cells	0.000252707	0.00156761	0.000393923	N/A
	activation of cytotoxic T cells	0.000367773	N/A	0.000731362	N/A
	trafficking of T lymphocytes	N/A	N/A	0.00324346	N/A
	transmigration of T lymphocytes	0.000589127	N/A	8.15207e-05	N/A
	recruitment of T lymphocytes	0.000725935	N/A	0.000176677	N/A
	cell movement of T lymphocytes	0.00320055	N/A	0.00226176	N/A
	attraction of memory T lymphocytes	0.00310255	N/A	N/A	N/A
	maintenance of memory T lymphocytes	N/A	N/A	0.000465912	N/A
	apoptosis of tumor-infiltrating lymphocytes	0.00113196	0.0039035	0.00152744	N/A
B Lymphocytes	differentiation of B lymphocytes	0.00448178	N/A	0.00328506	N/A
	lack of pro-B lymphocytes	N/A	N/A	N/A	0.00856269
	contact growth inhibition of pre-B lymphocytes	N/A	N/A	N/A	0.017053
	lack of B-1a lymphocytes	N/A	N/A	N/A	0.0254715
